# Supplementary material for: Immunoblot Criteria for Diagnosis of Lyme Disease: A Comparison of CDC Criteria to Alternative Interpretive Approaches
Source: MDPI journal article supplement (doi:10.3390/pathogens12111282), 2023-10-26
Supplement: s1 [file s1]

A. Immunoblot band frequencies in cross-reacting sera from CDC Lyme Serum Repository (Molins et al. [5]) (#subjects)

|                                          |       |      |       |      |      |      |    |    |      |      |       |      |             |
|------------------------------------------|-------|------|-------|------|------|------|----|----|------|------|-------|------|-------------|
| IgG immunoblot band kDa (B31 strain)     | 93(a) | 66   | 58    | 45   | 41   | 39   | 34 | 31 | 30   | 28   | 23(b) | 18   | FP Rate (%) |
| MarDx Marblot Western blot (LSR) (144)   | 0.01  | 0.06 | 0.03  | 0.01 | 0.32 | 0.03 | NA | NA | 0.01 | 0    | 0.01  | 0.01 | 0           |
| Viramed ViraStripe line blot (LSR) (144) | 0.06  | 0.19 | 0.19  | 0.07 | 0.58 | 0.01 | NA | NA | 0.03 | 0.02 | 0.12  | 0.07 | 1.4         |
| IgM immunoblot band kDa (B31 strain)     | 41    | 39   | 23(b) |      |      |      |    |    |      |      |       |      | FP Rate (%) |
| MarDx Marblot Western blot (LSR) (144)   | 0.08  | 0.06 | 0.15  |      |      |      |    |    |      |      |       |      | 7.6         |
| Viramed ViraStripe line blot (LSR) (144) | 0.22  | 0.21 | 0.16  |      |      |      |    |    |      |      |       |      | 10.4        |

Legend: FP, false-positive; LSR, CDC Lyme Serum Repository; kDa, kilodalton

(a) Reports 83- to 100-kDa molecular weight band

(b) Reports 21- to 25-kDa molecular weight band (OspC)

NOTE: see text for references and both text and Supplementary File S2 for dataset descriptions

B. False-positive rates of single-tier IgG immunoblots in different datasets generated by varying the minimum number of CDC-advocated IgG bands required to consider test positive (# subjects studied)

|                                                                                                                                                                | ≥2 bands | ≥3 bands | ≥4 bands | ≥5 bands |
|----------------------------------------------------------------------------------------------------------------------------------------------------------------|----------|----------|----------|----------|
| Viramed ViraStripe IgG line blot (LSR): includes cross-reacting controls plus healthy endemic and non-endemic controls using CDC-advocated bands (347)         | 33.70%   | 14.70%   | 5.20%    | 2.30%    |
| Immunetics Qualicode IgG Western blot 510(k): includes healthy endemic and non-endemic controls using CDC-advocated bands (without 31- and 34-kDa bands) (429) | 54.50%   | 24.20%   | 8.40%    | 1.90%    |
| Immunetics Qualicode IgG Western blot 510(k): includes healthy endemic and non-endemic controls using CDC-advocated bands plus 31- and 34-kDa bands (429)      | 59.90%   | 32.90%   | 13.50%   | 5.80%    |
| MarDx Marblot IgG Western blot (Trevejo [8]): includes healthy endemic controls using CDC-advocated bands (38)                                                 | 13.20%   | 5.30%    | 2.60%    | 2.60%    |

Legend: LSR, CDC Lyme Serum Repository; 510(k), medical device application to FDA; kDa, kilodalton

NOTE: see text for references and both text and Supplementary File S2 for dataset descriptions
