# Supplementary material for: Immunoblot Criteria for Diagnosis of Lyme Disease: A Comparison of CDC Criteria to Alternative Interpretive Approaches
Source: MDPI journal article supplement (doi:10.3390/pathogens12111282), 2023-10-26
Supplement: s1 [file s1]

| Healthy non-endemic control sera datasets (#subjects) |       |      |       | Band Frequency |      |      |      |      |      |      |       |      | FP Rate (%) |
|-------------------------------------------------------|-------|------|-------|----------------|------|------|------|------|------|------|-------|------|-------------|
| IgG immunoblot band kDa (B31 strain)                  | 93(a) | 66   | 58    | 45             | 41   | 39   | 34   | 31   | 30   | 28   | 23(b) | 18   |             |
| Immunetics QualiCode Western blot 510(k) (151)        | 0.1   | 0.17 | 0.07  | 0.05           | 0.93 | 0.07 | 0.13 | 0.21 | 0.16 | 0.05 | 0.14  | 0.05 | 4           |
| EUROIMMUN Western blot 510(k) (100)                   | 0.08  | 0.16 | 0.05  | 0.04           | 0.87 | 0.02 | NA   | NA   | 0.13 | 0    | 0.02  | 0.09 | 0           |
| MarDx Marblot Western blot (LSR) (102)                | 0     | 0.02 | 0.04  | 0.04           | 0.29 | 0.02 | NA   | NA   | 0    | 0.01 | 0.01  | 0.01 | 0           |
| Viramed ViraStripe line blot (LSR) (102)              | 0.06  | 0.28 | 0.07  | 0.1            | 0.66 | 0.04 | NA   | NA   | 0.03 | 0.04 | 0.28  | 0.15 | 1           |
| Gold Standard Diagnostics line blot 510(k) (115)      | 0.03  | 0.03 | 0.04  | 0.03           | 0.25 | 0.04 | NA   | NA   | 0.01 | 0.01 | 0.02  | 0    | 0           |
| IgM immunoblot band kDa (B31 strain)                  | 41    | 39   | 23(b) |                |      |      |      |      |      |      |       |      |             |
| Immunetics QualiCode Western blot 510(k) (151)        | 0.21  | 0.01 | 0.05  |                |      |      |      |      |      |      |       |      | 4           |
| EUROIMMUN Western blot 510(k) (98)                    | 0.87  | 0.02 | 0.02  |                |      |      |      |      |      |      |       |      | 4           |
| MarDx Marblot Western blot (LSR) (102)                | 0.1   | 0.03 | 0.2   |                |      |      |      |      |      |      |       |      | 2           |
| Viramed ViraStripe line blot (LSR) (102)              | 0.28  | 0.23 | 0.25  |                |      |      |      |      |      |      |       |      | 3.9         |
| Gold Standard Diagnostics line blot 510(k) (115)      | 0.03  | 0.01 | 0.07  |                |      |      |      |      |      |      |       |      | 0           |

Legend: FP, false-positive; LSR, CDC Lyme Serum Repository; kDa, kilodalton; 510(k), medical device application to FDA  
(a) reports 83- to 100-kDa molecular weight band  
(b) reports 21- to 25-kDa molecular weight band (OspC)

Note: see text and Supplementary File S2 for dataset descriptions
