# Supplementary material for: Immunoblot Criteria for Diagnosis of Lyme Disease: A Comparison of CDC Criteria to Alternative Interpretive Approaches
Source: MDPI journal article supplement (doi:10.3390/pathogens12111282), 2023-10-26
Supplement: s1 [file s1]

| Healthy endemic control sera datasets (#subjects) |       | Band Frequency |      |      |      |       |     |      |      |      |       |      | IgG FP Rate (%) |
|---------------------------------------------------|-------|----------------|------|------|------|-------|-----|------|------|------|-------|------|-----------------|
| IgG immunoblot band kDa (B31 strain)              | 93(a) | 66             | 58   | 45   | 41   | 39    | 34  | 31   | 30   | 28   | 23(b) | 18   |                 |
| Immunetics QualiCode Western blot 510(k) (278)    | 0.13  | 0.24           | 0.1  | 0.07 | 0.93 | 0.13  | 0.1 | 0.12 | 0.11 | 0.01 | 0.11  | 0.1  | 0.7             |
| EUROIMMUN Western blot 510(k) (98)                | 0.1   | 0.14           | 0.14 | 0.06 | 0.84 | 0.04  | NA  | NA   | 0.07 | 0.01 | 0.03  | 0.1  | 3.1             |
| MarDx Marblot Western blot 510(k) (291)*          | 0.03  | 0.04           | 0.12 | 0.01 | 0.8  | 0.27  | NA  | NA   | 0.01 | 0    | 0.04  | 0    | 1*              |
| MarDx Marblot Western blot (Trevejo) (38)         | 0.05  | 0.08           | 0.03 | 0.05 | 0.66 | 0.05  | 0   | 0    | 0    | 0.03 | 0     | 0.05 | 2.6             |
| MarDx Marblot Western blot (LSR) (101)            | 0.01  | 0.08           | 0.08 | 0.03 | 0.37 | 0.03  | NA  | NA   | 0.02 | 0    | 0.09  | 0.04 | 2               |
| Trinity Biotech MarStripe line blot 510(k) (219)* | 0.02  | 0.04           | 0.01 | 0    | 0.06 | 0.18  | NA  | NA   | 0.01 | 0.01 | 0.03  | 0.01 | 0.5*            |
| Viramed ViraStripe line blot (LSR) (101)          | 0.1   | 0.39           | 0.18 | 0    | 0.54 | 0.05  | NA  | NA   | 0.03 | 0.02 | 0.15  | 0.1  | 4               |
| Gold Standard Diagnostics Line blot 510(k) (119)  | 0.04  | 0.01           | 0.06 | 0.04 | 0.33 | 0.06  | NA  | NA   | 0.02 | 0.01 | 0.05  | 0.05 | 1.7             |
| IgM immunoblot band kDa (B31 strain)              | 93(a) | 41             | 39   | 34   | 31   | 23(b) |     |      |      |      |       |      | IgM FP Rate (%) |
| Immunetics QualiCode Western blot 510(k) (279)    | NA    | 0.3            | 0.03 | NA   | NA   | 0.06  |     |      |      |      |       |      | 4.7             |
| EUROIMMUN Western blot 510(k) (98)                | NA    | 0.84           | 0.04 | NA   | NA   | 0.03  |     |      |      |      |       |      | 5.1             |
| MarDx Marblot Western blot 510(k) (291)*          | NA    | 0.21           | 0.03 | NA   | NA   | 0.09  |     |      |      |      |       |      | 5*              |
| MarDx Marblot Western blot (Trevejo) (38)         | 0.05  | 0.05           | 0.08 | 0    | 0.03 | 0.11  |     |      |      |      |       |      | 2.6             |
| MarDx Marblot Western blot (LSR) (101)            | NA    | 0.05           | 0    | NA   | NA   | 0.23  |     |      |      |      |       |      | 2               |
| Trinity Biotech MarStripe line blot 510(k) (220)* | NA    | 0.01           | 0.01 | NA   | NA   | 0.02  |     |      |      |      |       |      | 0.5*            |
| Viramed ViraStripe line blot LSR (101)            | NA    | 0.17           | 0.2  | NA   | NA   | 0.08  |     |      |      |      |       |      | 11.9            |
| Gold Standard Diagnostics line blot 510(k) (119)  | NA    | 0.01           | 0.02 | NA   | NA   | 0.04  |     |      |      |      |       |      | 0               |

Legend: FP, false-positive; LSR, CDC Lyme Serum Repository samples; kDa, kilodaltons; 510(k), medical device application to FDA

(a) Reports 83- to 100-kDa molecular weight band

(b) Reports 21- to 25-kDa molecular weight band (OspC)

\*includes both endemic and non-endemic controls

NOTE: See text and Supplementary File S2 for dataset descriptions
