# Supplementary material for: Immunoblot Criteria for Diagnosis of Lyme Disease: A Comparison of CDC Criteria to Alternative Interpretive Approaches
Source: Pathogens. 2023 Oct 26;12(11):1282. doi: 10.3390/pathogens12111282 (PMC10674374; doi:10.3390/pathogens12111282)
Supplement: Supplementary file 1 [file pathogens-12-01282-s001.zip]

Archive with 7 entries (7 files):
- pathogens-2456134_Supplementary_File_S2.pdf
- Supplementary File S1. Alternative immunoblot criteria from Laboratory B.pdf
- Supplementary File S3. Immunetics QualiCode B. burgdorferi IgG Western blot controls (dataset 1).xlsx
- Supplementary File S4. MarDx Marblot IgG and IgM Western blots (Trevejo et al. [8], dataset 4).xlsx
- Supplementary Table S1. IgG and IgM immunoblot band frequencies among healthy endemic controls.pdf
- Supplementary Table S2. IgG and IgM immunoblot band frequencies among healthy non-endemic controls.pdf
- Supplementary Table S3. (A) IgG and IgM immunoblot band frequencies among cross-reacting controls, (B) IgG immunoblot band cutoff criteria.pdf
