# Supplementary material for: Immunoblot Criteria for Diagnosis of Lyme Disease: A Comparison of CDC Criteria to Alternative Interpretive Approaches
Source: Pathogens. 2023 Oct 26;12(11):1282. doi: 10.3390/pathogens12111282 (PMC10674374; doi:10.3390/pathogens12111282)
Supplement: Supplementary file 1 [file pathogens-12-01282-s001.zip › Supplementary File S3. Immunetics QualiCode B. burgdorferi IgG Western blot controls (dataset 1).xlsx]

## Sheet: Sheet1
ID_	G_93	G_66	G_60	G_58	G_45	G_41	G_39	G_37	G_34	G_31	G_30	G_28	G_23	G_18
C-1	0	1	1	0	0	1	0	0	0	0	1	0	0	0
C-2	0	0	0	0	0	1	0	0	0	0	0	0	0	0
C-3	0	0	0	0	0	1	0	0	0	1	0	0	0	1
C-4	0	0	0	0	0	1	0	0	0	0	0	0	0	0
C-5	0	0	0	0	0	1	0	0	0	0	0	0	0	0
C-6	0	0	0	0	1	1	0	0	0	0	0	0	0	0
C-7	0	0	0	0	0	1	0	0	0	0	0	0	0	0
C-8	0	0	1	0	0	1	0	0	0	0	0	0	0	0
C-9	1	0	0	0	0	1	0	0	0	0	0	0	0	0
C-10	0	0	1	0	0	0	0	0	0	0	0	0	0	0
C-11	0	0	0	0	0	0	0	0	0	0	0	0	0	0
C-12	0	0	0	0	0	1	0	0	0	0	0	0	0	0
C-13	0	1	0	0	1	1	0	0	0	1	0	0	0	0
C-14	0	0	0	0	0	1	0	0	1	1	1	0	1	0
C-15	0	0	1	0	1	1	0	0	0	0	1	0	0	0
C-16	0	0	0	0	0	1	0	0	0	0	0	0	1	0
C-17	0	0	1	0	0	1	0	0	0	0	0	0	0	0
C-18	0	0	0	0	0	1	0	0	0	0	0	0	0	0
C-19	0	0	0	0	1	1	0	0	0	0	0	0	0	0
C-20	0	0	0	0	1	1	0	0	0	0	0	0	0	0
C-21	0	0	1	0	0	1	1	0	0	0	1	0	0	0
C-22	0	0	0	0	0	1	0	0	0	0	0	0	0	0
C-23	0	0	0	0	1	1	0	0	1	1	0	0	0	0
C-24	0	0	1	0	0	1	0	0	0	0	0	0	0	0
C-25	1	1	1	0	0	1	0	0	1	0	0	0	0	1
C-26	0	0	0	1	1	1	0	0	0	1	0	0	0	1
C-27	0	0	1	0	0	1	0	0	0	1	0	0	0	0
C-28	0	0	1	0	0	1	1	0	1	0	0	0	0	0
C-29	0	0	1	0	1	1	0	0	0	1	0	0	0	0
C-30	0	0	1	0	0	1	0	0	0	0	0	0	0	0
C-31	0	0	0	0	0	1	0	0	0	0	1	0	0	0
C-32	1	1	0	0	0	1	0	0	0	0	0	0	0	0
C-33	0	1	0	1	0	1	0	0	0	0	0	0	0	0
C-34	0	1	0	1	0	1	0	0	0	0	0	0	0	0
C-35	0	0	1	0	1	1	0	0	0	0	0	0	0	0
C-36	0	0	0	0	0	0	0	0	0	0	0	0	0	0
C-37	0	0	1	1	1	1	0	0	0	0	0	0	0	0
C-38	0	0	1	0	1	1	0	0	0	0	0	0	0	0
C-39	0	0	1	0	1	1	0	0	1	0	0	0	1	0
C-40	0	0	0	0	0	1	0	0	0	0	0	0	0	0
C-41	1	1	0	0	0	1	0	0	0	0	0	0	0	0
C-42	0	1	0	0	0	1	1	0	0	0	0	0	0	0
C-43	0	1	0	0	0	1	1	0	0	0	0	0	0	0
C-44	0	0	0	0	1	1	0	0	0	0	0	0	0	0
C-45	0	0	1	0	1	1	0	0	0	0	0	0	0	0
C-46	0	0	0	0	0	1	0	0	0	0	0	0	0	0
C-47	0	1	1	0	1	1	0	0	0	0	0	0	0	0
C-48	0	0	0	0	1	1	0	0	1	0	0	0	0	0
C-49	0	0	0	0	0	1	0	0	0	0	0	0	0	0
C-50	0	0	0	0	0	0	0	0	0	0	0	0	0	0
C-51	1	0	0	0	0	1	1	0	0	0	0	0	0	0
C-52	1	0	0	0	0	0	0	0	0	0	0	0	0	0
C-53	0	0	0	0	0	1	0	0	0	1	0	0	0	1
C-54	0	0	0	0	0	1	0	0	0	0	0	0	0	0
C-55	1	1	0	1	0	1	0	0	0	0	0	0	0	0
C-56	1	1	0	0	0	1	0	0	0	0	0	0	0	0
C-57	0	0	0	0	0	1	0	0	0	0	0	0	0	0
C-58	0	0	0	0	0	1	0	0	0	0	0	0	0	0
C-59	0	1	0	1	1	1	1	0	0	0	0	0	0	0
C-60	0	0	0	0	0	1	0	0	0	0	0	0	0	0
C-61	0	0	0	0	0	1	0	0	0	0	1	0	0	0
C-62	0	0	0	0	0	1	0	0	0	0	0	0	0	0
C-63	0	0	0	0	0	1	0	0	0	0	0	0	0	0
C-64	0	1	0	0	0	1	0	0	0	0	1	0	0	0
C-65	0	1	0	0	0	1	0	0	0	0	0	0	0	0
C-66	0	1	0	0	0	1	0	0	0	0	0	0	1	0
C-67	0	0	0	0	0	1	1	0	0	0	0	0	0	0
C-68	0	0	0	0	0	1	0	0	0	0	0	0	0	0
C-69	1	0	0	0	0	1	0	0	0	0	0	0	0	0
C-70	0	1	0	0	0	1	0	0	0	0	0	0	0	0
C-71	0	0	1	0	1	1	0	0	0	0	0	0	0	0
C-72	0	1	0	0	0	1	0	0	0	0	0	0	0	0
C-73	0	0	1	0	0	1	0	0	0	0	0	0	0	1
C-74	0	0	0	0	0	1	0	0	0	0	1	1	1	0
C-75	1	0	1	0	1	1	0	0	0	0	0	0	0	0
C-76	0	0	0	0	0	1	0	0	0	0	0	0	0	1
C-77	1	1	1	0	1	1	0	0	0	1	0	0	0	0
C-78	0	0	0	0	0	1	0	0	0	0	0	0	0	0
C-79	1	0	1	0	0	1	0	0	0	0	0	0	0	0
C-80	0	0	0	0	0	1	0	0	0	0	0	0	0	0
C-81	0	0	0	0	0	1	1	0	0	0	0	0	0	0
C-82	0	0	0	0	0	1	0	0	1	1	0	0	1	1
C-83	0	1	0	0	0	1	0	0	0	1	0	0	1	1
C-84	0	0	0	0	1	1	0	0	0	0	0	0	0	0
C-85	0	0	0	0	0	1	0	0	0	0	1	0	1	0
C-86	0	0	0	0	0	1	0	0	0	0	0	0	0	0
C-87	1	0	0	0	0	1	0	0	0	1	0	0	0	0
C-88	0	0	1	1	0	1	0	0	0	1	0	0	1	0
C-89	1	0	0	0	0	1	0	0	0	0	0	0	1	0
C-90	1	1	1	1	0	1	0	0	0	0	0	0	0	0
C-91	0	0	0	0	0	1	0	0	0	0	0	0	0	0
C-92	0	0	0	0	0	1	0	0	0	0	0	0	0	0
C-93	0	0	0	0	0	1	0	0	0	0	0	0	0	0
C-94	0	0	0	0	0	1	0	0	0	0	0	0	0	0
C-95	0	0	0	0	1	1	0	0	0	0	0	0	0	0
C-96	0	0	0	0	0	1	0	0	0	0	0	0	0	0
C-97	0	0	1	0	1	1	0	0	0	0	1	0	0	0
C-98	0	0	0	0	0	1	0	0	0	0	1	0	0	0
C-99	0	0	0	0	0	1	0	0	0	0	0	0	0	0
C-100	0	1	0	0	1	1	0	0	0	0	0	0	0	0
C-101	0	0	1	1	0	1	0	0	0	0	0	0	0	0
C-102	1	0	0	0	0	1	0	0	0	0	0	0	0	1
C-103	0	0	1	0	0	1	0	0	0	0	1	0	0	1
C-104	0	1	0	0	0	1	0	0	0	0	0	0	0	0
C-105	0	0	1	0	0	1	0	0	0	0	0	0	0	0
C-106	0	0	1	0	0	1	0	0	0	0	0	0	0	0
C-107	1	1	1	0	0	1	0	0	0	0	0	0	1	0
C-108	0	0	1	0	0	1	0	0	0	1	0	0	0	0
C-109	0	0	0	0	0	1	0	0	0	0	0	0	0	0
C-110	0	0	1	1	0	1	0	0	0	0	1	0	0	0
C-111	0	0	0	0	0	1	0	0	0	0	0	0	0	0
C-112	0	0	1	1	0	1	0	0	0	0	1	0	0	0
C-113	0	0	0	0	0	1	0	0	1	0	0	0	0	0
C-114	0	0	1	0	0	1	0	0	0	0	1	0	0	0
C-115	0	0	0	0	0	1	0	0	0	1	1	0	0	0
C-116	0	0	0	0	0	1	0	0	0	0	1	1	1	0
C-117	0	0	0	0	0	1	0	0	0	0	0	0	0	0
C-118	1	0	1	0	0	1	0	0	1	1	0	0	0	0
C-119	0	1	0	0	0	1	0	0	0	0	0	0	0	0
C-120	0	0	0	0	0	1	1	0	0	0	0	0	0	1
C-121	0	1	0	1	0	1	0	0	0	0	1	0	0	0
C-122	0	0	1	0	1	1	1	0	0	1	0	0	0	0
C-123	0	1	1	0	0	1	1	0	0	0	0	0	0	0
C-124	0	1	0	0	1	1	0	0	0	0	0	0	0	0
C-125	0	1	1	0	0	1	0	0	0	0	0	0	0	0
C-126	0	1	1	1	0	1	0	0	0	0	0	0	1	0
C-127	0	1	1	0	0	1	0	0	0	0	0	0	0	0
C-128	0	0	0	0	0	1	0	0	0	0	0	0	0	0
C-129	0	0	0	0	1	1	0	0	0	0	0	0	0	0
C-130	0	0	0	1	0	1	0	0	0	0	0	0	0	0
C-131	0	0	1	0	0	1	0	0	0	0	0	0	0	0
C-132	0	0	0	0	0	0	0	0	0	0	0	0	0	0
C-133	0	0	1	0	0	1	1	0	0	0	0	0	0	0
C-134	0	0	0	0	0	1	0	0	0	0	0	0	0	0
C-135	0	0	0	0	0	1	0	0	0	0	0	0	0	0
C-136	0	1	0	0	1	1	0	0	0	0	0	0	0	0
C-137	0	1	1	1	0	1	0	0	0	0	0	0	0	0
C-138	0	0	0	0	0	1	0	0	0	0	0	0	0	0
C-139	0	0	1	0	0	1	1	0	0	0	0	0	0	0
C-140	0	0	0	0	1	1	1	0	0	0	0	0	0	0
C-141	0	1	1	1	0	1	0	0	0	1	1	0	0	0
C-142	0	0	1	0	0	1	1	0	1	0	0	0	0	0
C-143	0	0	0	0	0	1	0	0	0	0	0	0	0	0
C-144	0	0	0	0	0	1	0	0	0	1	0	0	0	0
C-145	0	1	0	0	0	1	0	0	0	0	0	0	0	0
C-146	0	1	1	0	1	1	0	0	0	1	1	0	0	0
C-147	1	1	1	0	0	1	0	0	0	0	1	0	0	0
C-148	0	0	0	0	0	1	0	0	0	1	1	1	1	0
C-149	0	1	0	0	0	1	0	0	0	0	1	1	0	0
C-150	1	1	1	0	0	1	0	0	0	1	1	0	0	0
C-151	0	0	1	0	0	1	0	0	1	0	0	0	0	0
C-152	0	0	1	0	0	1	0	0	1	1	0	0	1	0
C-153	0	0	0	0	0	0	0	0	0	0	0	0	0	1
C-154	0	0	0	0	0	1	0	0	0	0	0	1	0	0
C-155	0	0	1	0	0	1	0	0	0	0	0	0	0	0
C-156	0	0	1	0	0	1	0	0	0	0	0	0	0	0
C-157	0	0	1	0	0	1	1	0	0	0	0	0	0	0
C-158	0	1	1	0	0	1	0	0	0	0	0	0	1	0
C-159	0	0	1	0	0	1	1	0	0	0	0	0	0	0
C-160	0	1	0	1	0	1	0	0	0	0	0	0	0	0
C-161	0	1	1	0	0	1	0	0	1	1	0	0	0	0
C-162	0	1	1	0	0	1	0	0	0	1	0	0	0	0
C-163	0	0	0	0	0	1	0	0	0	0	0	0	1	0
C-164	0	0	0	0	0	1	0	0	0	0	0	0	0	0
C-165	0	0	0	0	0	1	0	0	0	0	0	0	0	0
C-166	0	0	1	0	0	1	0	0	0	0	0	0	0	0
C-167	0	0	0	0	0	1	0	0	0	0	0	0	0	0
C-168	1	0	0	0	0	1	0	0	0	0	0	0	0	1
C-169	0	0	1	0	0	1	0	0	0	0	0	0	1	0
C-170	0	0	1	0	0	1	1	0	0	0	0	0	1	0
C-171	0	1	1	0	0	1	0	0	0	0	0	0	0	0
C-172	0	0	0	0	0	0	0	0	0	0	0	0	0	0
C-173	0	0	0	1	0	1	0	0	0	0	0	1	0	1
C-174	0	0	0	0	0	1	0	0	0	0	0	0	0	0
C-175	0	0	0	0	0	1	0	0	0	0	0	0	0	0
C-176	0	0	1	0	0	1	0	0	0	0	0	0	0	0
C-177	0	0	0	0	0	1	0	0	0	0	0	0	0	0
C-178	1	1	1	0	0	1	0	0	0	0	0	0	0	0
C-179	0	0	0	0	0	1	0	0	0	0	0	0	0	0
C-180	0	1	0	0	0	1	0	0	0	0	1	0	0	0
C-181	0	0	0	0	0	1	0	0	0	0	0	0	0	0
C-182	0	0	0	0	0	1	1	0	0	0	0	0	0	0
C-183	0	0	0	0	0	1	0	0	1	0	0	0	0	1
C-184	0	0	0	0	0	1	0	0	0	0	0	0	0	0
C-185	0	0	0	0	0	1	0	0	0	0	0	0	0	1
C-186	0	0	0	0	0	1	1	0	1	1	0	0	0	0
C-187	0	0	0	0	0	1	0	0	0	0	1	1	0	0
C-188	0	0	1	0	0	1	1	0	0	0	0	0	0	0
C-189	0	1	1	0	0	1	1	0	0	0	0	0	0	0
C-190	0	0	1	0	0	1	0	0	0	0	0	0	0	0
C-191	0	0	0	0	0	1	0	0	0	0	0	0	0	0
C-192	0	0	0	0	0	1	0	0	0	1	0	0	0	0
C-193	0	0	1	0	0	0	1	0	0	0	0	0	0	0
C-194	0	0	0	0	0	1	0	0	0	0	0	0	0	0
C-195	0	0	0	0	0	1	0	0	0	0	0	0	0	0
C-196	0	0	0	0	0	1	0	0	0	0	0	0	0	0
C-197	0	0	1	0	0	1	0	0	0	0	0	1	0	0
C-198	0	0	0	0	0	1	0	0	0	0	0	0	0	0
C-199	0	0	0	0	0	1	0	0	0	0	1	0	0	1
C-200	0	0	0	0	0	0	0	0	0	0	0	0	0	0
C-201	0	0	1	0	0	1	0	0	0	0	0	0	0	0
C-202	0	1	0	0	0	1	0	0	0	0	0	0	0	0
C-203	0	0	0	0	0	1	0	0	0	0	0	0	0	0
C-204	0	0	0	0	0	1	0	0	0	0	0	0	0	0
C-205	0	0	0	0	0	0	0	0	0	0	0	0	0	0
C-206	0	0	0	0	0	0	0	0	0	0	0	0	0	0
C-207	0	1	0	0	0	1	0	0	0	0	0	0	0	0
C-208	0	0	0	0	0	1	1	0	0	0	0	0	0	0
C-209	0	0	0	0	0	1	0	0	0	0	0	0	0	0
C-210	0	0	0	0	0	0	0	0	0	0	0	0	0	0
C-211	0	0	0	0	0	1	0	0	0	0	0	0	0	0
C-212	0	0	1	0	0	1	0	0	0	0	0	0	0	0
C-213	0	0	0	0	0	1	0	0	0	0	0	0	0	0
C-214	0	0	0	0	0	1	0	0	0	0	0	0	0	0
C-215	0	1	0	1	0	1	0	0	0	0	0	0	0	0
C-216	0	1	0	0	0	1	0	0	0	0	0	0	0	0
C-217	0	0	0	0	1	1	0	0	0	0	0	0	0	0
C-218	0	0	0	0	0	1	0	0	0	0	0	0	0	0
C-219	0	0	0	0	0	1	0	0	0	0	0	0	0	0
C-220	0	1	0	0	0	1	0	0	0	0	0	0	0	0
C-221	0	1	0	0	0	1	0	0	0	0	0	0	0	0
C-222	0	0	0	0	0	1	0	0	0	0	0	0	0	0
C-223	0	0	0	0	0	1	0	0	0	0	0	0	0	0
C-224	0	1	0	1	0	1	0	0	0	0	0	0	0	0
C-225	0	1	0	0	1	1	0	0	0	0	0	0	0	0
C-226	0	0	0	0	0	1	0	0	0	0	0	0	0	0
C-227	0	1	0	0	1	1	0	0	0	0	0	0	0	0
C-228	0	1	0	0	0	1	0	0	0	0	0	0	0	0
C-229	0	1	0	0	0	1	0	0	0	0	0	0	0	0
C-230	0	0	0	0	0	1	0	0	0	0	1	0	0	0
C-231	0	0	1	0	0	1	0	0	0	0	0	0	0	0
C-232	0	0	0	0	0	1	0	0	1	0	0	0	0	0
C-233	0	0	1	0	0	1	0	0	0	0	0	0	0	0
C-234	0	0	0	0	0	1	0	0	0	0	0	0	0	0
C-235	0	0	1	0	0	1	0	0	0	0	0	0	0	0
C-236	0	0	1	0	0	0	0	0	0	0	0	0	0	1
C-237	0	0	0	0	1	1	0	0	0	1	0	0	0	1
C-238	0	0	1	0	0	1	0	0	0	0	0	0	0	0
C-239	0	0	1	0	0	1	0	0	0	0	0	0	1	0
C-240	0	0	1	0	0	1	0	0	0	1	0	0	0	0
C-241	0	0	1	0	1	1	0	0	0	0	0	0	0	0
C-242	0	0	0	0	0	1	0	0	0	0	1	0	0	0
C-243	1	0	1	1	1	1	0	0	1	1	0	0	0	0
C-244	1	0	1	0	0	1	0	0	0	0	0	0	0	0
C-245	0	0	0	0	0	1	0	0	0	0	0	0	0	0
C-246	0	0	0	0	1	1	0	0	0	0	0	0	1	0
C-247	0	0	1	0	0	1	0	0	0	0	0	0	0	0
C-248	1	0	1	0	0	1	0	0	1	1	0	0	0	0
C-249	0	0	1	0	0	1	0	0	0	0	0	0	0	0
C-250	1	0	1	0	0	1	0	0	0	0	0	0	0	0
C-251	1	0	1	1	0	1	0	0	1	1	0	0	1	0
C-252	0	0	0	0	0	1	0	0	0	0	0	0	0	0
C-253	1	0	0	0	0	1	0	0	1	0	1	0	0	0
C-254	1	0	1	0	0	1	0	0	0	0	0	0	0	0
C-255	0	0	0	0	0	1	0	0	0	0	0	0	0	0
C-256	0	0	1	0	1	1	0	0	0	0	0	0	0	0
C-257	0	0	1	0	0	1	0	0	0	0	0	0	0	0
C-258	0	0	0	0	0	1	0	0	0	0	0	1	0	0
C-259	1	0	1	0	1	1	1	0	1	0	1	0	1	1
C-260	0	0	1	0	0	1	0	0	0	0	0	0	0	0
C-261	0	0	0	0	0	1	0	0	0	0	0	0	0	0
C-262	0	0	0	1	0	1	0	0	0	0	0	0	0	0
C-263	0	1	0	0	1	0	0	0	0	0	0	0	0	0
C-264	0	1	0	0	0	1	0	0	0	0	0	0	0	0
C-265	0	1	0	0	0	0	0	0	0	0	0	0	0	0
C-266	0	0	0	0	0	1	0	0	0	1	0	0	0	0
C-267	0	0	0	0	0	1	0	0	1	0	0	0	0	1
C-268	0	0	0	0	0	1	0	0	0	1	0	0	0	1
C-269	0	0	0	0	0	1	0	0	0	0	0	0	0	0
C-270	0	0	0	0	0	1	0	0	1	0	0	0	0	0
C-271	0	0	0	0	1	1	0	0	0	0	1	0	0	0
C-272	0	0	1	0	0	1	0	0	0	0	0	0	0	0
C-273	0	0	0	0	0	1	0	0	0	0	0	0	0	1
C-274	0	0	0	0	0	1	0	0	1	0	0	0	0	0
C-275	0	0	0	0	0	1	0	0	1	0	0	0	0	0
C-276	0	0	0	0	0	1	1	0	1	0	0	0	0	0
C-277	0	0	1	0	0	1	0	0	1	0	0	0	1	0
C-278	0	0	0	0	0	1	0	0	0	0	0	0	0	0
N170	0	0	1	0	0	1	0	0	0	0	1	0	0	0
N171	0	0	1	0	0	1	0	0	0	0	0	0	0	0
N173	0	0	0	0	0	1	0	0	0	0	0	0	0	0
N175	1	0	1	0	0	1	0	0	0	0	0	0	1	0
N176	1	0	1	0	0	1	0	0	0	0	0	0	0	0
N177	0	0	0	0	0	1	0	0	0	0	1	1	1	0
N180	0	0	0	0	0	1	0	0	0	0	0	0	0	0
N181	1	0	0	0	0	1	0	0	0	0	0	0	0	0
N182	0	0	0	0	0	0	0	0	0	0	0	0	0	0
N187	0	1	0	0	0	1	0	0	0	0	0	0	0	0
N188	0	0	0	0	0	1	0	0	0	0	0	0	0	1
N189	0	0	0	0	0	1	0	0	0	0	0	0	0	0
N194	0	0	0	0	0	1	0	0	0	0	0	0	0	0
N195	0	0	0	0	0	1	0	0	0	0	0	0	1	0
N196	0	0	0	0	0	1	0	0	0	0	1	0	0	0
N197	0	0	0	0	0	1	0	0	0	0	0	0	0	0
N200	0	0	0	0	0	1	0	0	0	0	0	0	0	0
N201	1	1	0	0	0	1	0	0	0	0	0	0	1	0
N202	0	0	0	0	0	1	0	0	0	0	0	0	0	0
N207	0	0	0	0	0	1	0	0	0	0	0	0	0	0
N208	0	0	0	0	0	1	0	0	0	0	0	0	0	0
N213	0	0	1	0	0	1	0	0	0	1	0	0	0	0
N214	0	0	0	0	0	1	0	0	0	0	0	0	1	0
N217	0	1	1	0	0	1	0	0	1	1	1	0	0	0
N218	0	0	0	0	0	0	0	0	0	0	0	0	0	0
N220	0	0	1	0	0	1	0	0	0	1	1	1	0	0
N221	0	0	0	0	0	1	0	0	0	1	1	0	0	0
N225	0	0	1	0	0	1	0	0	0	1	0	0	1	0
N226	0	0	0	0	0	1	0	0	1	0	0	0	1	0
N232	0	0	0	1	0	1	0	0	0	0	0	0	0	1
N233	0	0	1	1	0	1	0	0	0	0	0	0	0	0
N234	0	0	0	0	0	0	0	0	0	0	0	0	0	0
N240	0	0	1	1	0	1	0	0	0	0	0	0	0	0
N241	0	0	1	0	0	1	1	0	0	0	0	0	0	0
N245	0	0	1	0	0	1	0	0	0	0	0	0	0	0
N246	0	0	1	0	0	1	0	0	0	0	0	1	0	0
N250	0	1	0	0	0	1	0	0	0	0	0	0	0	0
N264	0	0	1	0	0	1	0	0	1	1	0	0	0	0
N265	0	0	0	0	0	1	0	0	0	0	0	0	0	0
N266	1	1	1	0	0	1	0	0	1	1	0	0	1	0
N267	1	0	1	0	0	1	1	0	0	1	1	0	1	1
N271	0	0	0	0	1	1	0	0	1	1	0	0	0	0
N272	0	1	1	0	1	1	0	0	0	1	1	0	1	1
N273	0	1	1	0	0	1	0	0	0	1	1	0	1	0
N274	0	0	0	0	0	1	0	0	0	1	0	0	1	0
N280	0	0	0	0	0	1	0	0	0	0	0	0	0	0
N281	0	0	0	1	0	1	0	0	0	0	0	0	0	0
N282	0	0	0	0	0	1	0	0	0	0	1	0	0	0
N283	0	0	0	0	0	1	0	0	0	1	0	0	0	0
N288	1	0	0	0	0	1	0	0	0	0	0	0	0	0
N289	0	0	0	0	0	1	0	0	1	0	0	0	0	0
N290	0	0	0	0	0	0	0	0	0	0	0	0	0	0
N291	1	0	0	0	0	1	0	0	1	0	0	0	1	0
N293	0	0	0	0	0	1	0	0	1	1	0	0	0	0
N299	0	0	1	0	0	1	0	0	0	0	0	0	0	0
N300	0	0	0	0	0	0	0	0	0	0	0	0	0	0
N301	0	0	0	0	0	1	0	0	1	0	0	0	0	0
N306	0	1	1	0	0	1	0	0	0	0	0	0	0	1
N307	0	0	0	0	0	1	0	0	0	0	0	0	0	0
N308	0	1	0	0	0	1	0	0	0	0	0	0	0	0
N309	0	0	0	0	0	1	0	0	0	0	0	0	0	0
N313	0	0	0	0	0	1	0	0	0	0	0	0	0	0
N314	0	1	0	0	0	1	1	0	0	1	0	0	0	0
N315	0	0	1	1	0	1	0	0	0	0	0	0	1	0
N316	0	1	0	0	0	1	0	0	0	1	0	0	0	0
N322	0	0	0	0	0	1	0	0	0	0	0	0	0	0
N323	0	0	0	0	0	1	0	0	0	1	0	0	0	0
N324	0	0	1	0	0	1	0	0	0	0	0	0	0	0
N325	0	0	1	1	0	0	0	0	1	0	0	0	0	0
N326	0	1	1	0	0	1	0	0	1	0	0	0	0	0
N333	0	0	0	1	0	1	0	0	1	0	0	0	0	0
N334	0	0	0	0	0	1	0	0	0	0	0	0	0	0
N335	0	0	1	0	0	1	1	0	0	0	0	0	0	0
N336	0	0	1	0	0	1	0	0	0	0	0	0	0	0
N337	0	0	1	0	1	1	0	0	0	0	0	0	0	0
N338	0	0	1	1	1	0	0	0	0	0	1	0	0	0
N339	0	1	1	0	1	1	0	0	0	0	1	0	0	0
N340	0	0	1	0	0	1	0	0	0	0	0	0	0	0
N341	0	0	0	0	0	1	0	0	0	0	0	0	0	0
N348	0	0	0	0	0	1	0	0	0	0	0	0	0	0
N349	0	0	0	0	0	1	0	0	0	0	0	0	0	0
N350	0	0	0	0	0	1	0	0	0	0	0	0	0	0
N351	0	0	0	0	0	1	0	0	0	0	0	0	0	0
N352	0	0	1	0	0	1	0	0	0	1	0	0	0	0
N356	0	0	0	0	0	1	0	0	0	1	0	0	0	0
N357	0	0	1	0	0	1	0	0	0	0	0	0	0	0
N358	0	0	0	0	0	1	0	0	0	0	0	0	0	0
N361	0	0	1	0	0	1	0	0	0	0	0	0	0	0
N362	0	0	0	0	0	0	0	0	0	0	0	0	0	0
N363	0	1	1	0	0	1	0	0	0	0	0	0	0	0
N364	1	1	1	0	0	1	0	0	1	1	0	0	0	0
N365	1	1	1	0	0	1	0	0	1	1	1	0	1	0
N367	0	0	1	0	0	1	0	0	0	0	0	0	0	0
N370	0	1	1	0	0	1	0	0	0	1	0	0	0	0
N373	0	0	0	0	0	0	0	0	0	1	0	0	0	0
N374	0	0	0	0	0	1	0	0	0	0	0	0	0	0
N375	0	0	1	0	0	1	0	0	0	0	1	0	0	0
N376	0	0	0	0	0	1	0	0	0	1	1	0	0	0
N378	0	0	0	0	0	1	0	0	0	0	0	0	0	0
N379	0	0	1	0	0	1	0	0	0	0	0	0	0	0
N382	1	0	1	0	0	1	0	0	0	0	0	0	0	0
N383	0	0	0	0	0	1	0	0	0	0	0	0	0	0
N424	0	0	0	0	0	1	0	0	1	1	0	0	1	0
N425	0	0	1	0	0	1	0	0	0	1	1	0	0	0
N427	0	0	1	0	0	1	0	0	0	0	0	0	0	0
N428	0	0	1	0	0	1	0	0	1	1	0	0	0	0
N435	0	0	1	0	0	1	0	0	1	1	1	0	0	0
N436	0	0	0	0	0	1	1	0	0	1	0	0	0	0
N438	0	0	1	0	0	1	0	0	0	0	0	0	0	0
N439	1	1	1	1	0	1	0	0	1	1	1	0	0	0
N443	0	0	0	0	0	1	0	0	0	0	0	0	0	0
N444	0	0	1	0	0	1	0	0	0	0	0	0	0	0
N448	1	1	1	1	0	1	0	0	0	1	0	1	1	0
N449	0	0	0	0	0	1	0	0	0	0	0	0	0	0
N450	0	1	0	1	0	1	0	0	0	0	1	0	0	0
N455	0	0	0	0	0	1	0	0	0	0	0	0	0	0
N457	1	0	1	0	0	1	0	0	1	0	0	0	1	1
N458	0	0	1	0	0	1	0	0	0	0	0	0	0	0
N459	0	0	0	0	0	1	0	0	0	0	0	0	0	0
N462	0	0	0	0	0	1	0	0	0	0	1	0	0	0
N618	0	0	0	0	0	1	0	0	0	0	0	0	0	0
N619	0	0	0	0	1	1	0	0	0	0	0	0	0	0
N620	0	0	0	0	0	1	0	0	0	0	0	0	0	0
N621	0	0	0	0	0	1	0	0	0	0	0	0	0	0
N622	0	0	0	0	0	1	0	0	0	0	1	0	0	0
N623	0	0	0	0	0	1	0	0	0	0	1	0	1	0
N624	0	0	0	0	1	1	0	0	0	0	0	0	1	0
N627	0	1	0	0	0	0	0	0	0	0	0	0	0	0
N628	0	1	0	0	0	1	1	0	0	0	0	0	0	0
N629	0	1	0	0	0	1	1	0	0	0	0	1	0	0
N630	0	0	0	0	0	1	0	0	0	0	0	0	0	0
N631	0	0	0	0	0	1	0	0	0	0	0	0	0	0
N632	0	0	0	0	0	1	0	0	0	0	0	1	0	0
N633	0	0	0	0	0	1	0	0	0	0	0	0	0	0
N634	1	0	0	0	1	1	1	0	0	0	1	0	0	1
N637	0	1	0	0	0	1	0	0	0	0	0	0	0	0
N638	0	0	0	0	0	1	1	0	0	0	1	0	0	0
N639	0	0	0	0	0	1	0	0	0	0	0	0	0	0
N640	0	0	0	0	0	1	0	0	0	0	0	0	0	0
N644	0	0	0	0	0	1	0	0	0	0	0	0	0	0
N645	0	0	0	0	0	1	0	0	0	0	0	0	0	0
N646	0	0	0	0	0	1	0	0	0	0	0	0	0	0
N647	0	0	0	0	0	1	0	0	0	0	0	0	0	0
N648	0	0	0	0	0	1	0	0	0	0	0	0	0	0
N649	0	0	0	0	0	1	1	0	0	0	0	0	0	0
N653	0	0	0	0	0	1	0	0	0	0	0	0	0	0
N654	0	0	0	0	0	1	0	0	0	0	0	0	0	0
N656	0	1	0	0	0	1	0	0	0	0	0	0	0	0
N657	0	0	0	0	0	1	0	0	0	0	0	1	1	0
N658	0	0	0	0	0	1	0	0	0	0	0	0	0	0
N659	0	0	0	0	0	1	0	0	0	0	0	0	0	0
IgG Immunoblots from Immunetics QualiCode B. burgdorferi IgG and IgM Western blot [510(k), dataset 1]. See text and Supplementary File S2 for dataset description.
Column A: Specimen number. Specimens beginning with letter "C" prefex are endemic controls. Specimens beginning with letter "N" prefex are non-endemic controls.
Columns B through O: Correspond to 93-, 66-, 60-, 58-, 45-, 41-, 39-, 37-, 34-, 31-, 30-, 28-, 23-, and 18-kDa IgG bands. 1 = band present, 0 = band absent.
